# Supplementary material for: High-yield bamboo-like porous carbon nanotubes with high-rate capability as anodes for lithium-ion batteries
Source: Royal Society of Chemistry journal article supplement (doi:10.1039/c4ra05978f), 2014-09-23
Supplement: c4ra05978f1.pdf [file c4ra05978f1.pdf]

## Supporting Information

### **High-yield bamboo-like porous carbon nanotubes with high-rate capability as anodes for lithium-ion batteries**

Yakun Tang, Lang Liu\*, Xingchao Wang, Huijuan Zhou, Diansheng Jia\*

*Key Laboratory of Material and Technology for Clean Energy, Ministry of Education;*

*Institute of Applied Chemistry, Xinjiang University. Urumqi 830046, Xinjiang, China.*

*E-mail: liulang@xju.edu.cn; jdz@xju.edu.cn.*

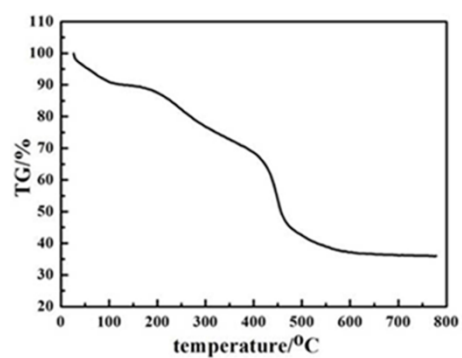

**Fig.SI1** TGA curve of SPNTs under N<sub>2</sub> atmosphere.

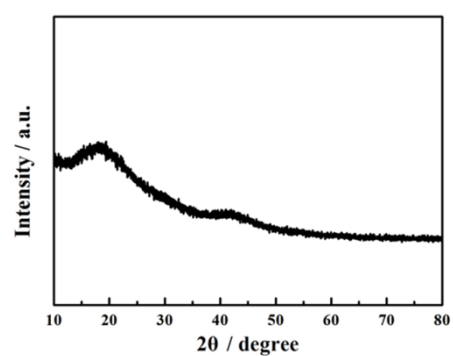

**Fig.SI2** XRD pattern of SPNTs.

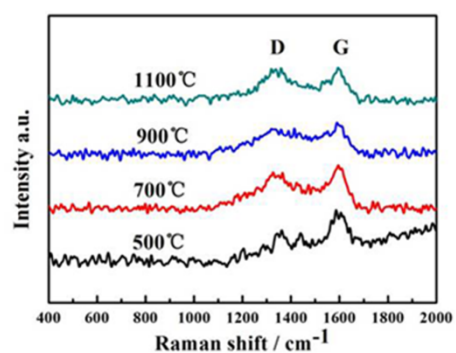

**Fig.SI3** Raman spectra of products by the pyrolysis of SPNTs at different temperatures.

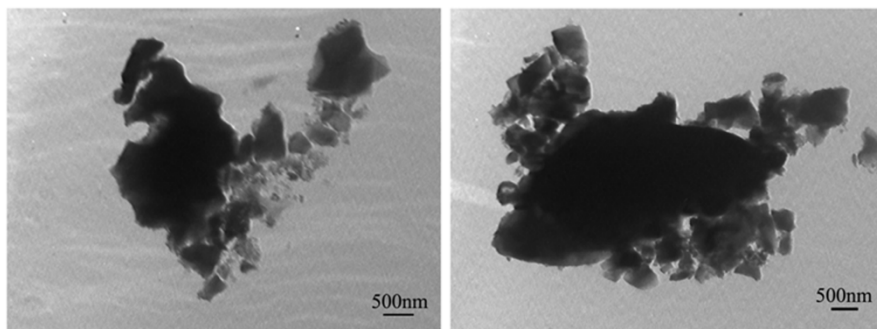

**Fig.SI4** TEM images of products by the pyrolysis of PNTs at 700°C in N<sub>2</sub> atmosphere.

**Table.SI1** The micropore volume and BET surface areas for the CNTs obtained at different temperature.

| Samples  | BET surface areas (m <sup>2</sup> /g) | Micropore volume (cm <sup>3</sup> /g) |
|----------|---------------------------------------|---------------------------------------|
| CNT-500  | 369.9                                 | 0.1234                                |
| CNT-700  | 418.7                                 | 0.1414                                |
| CNT-900  | 490.8                                 | 0.1742                                |
| CNT-1100 | 683.9                                 | 0.2160                                |

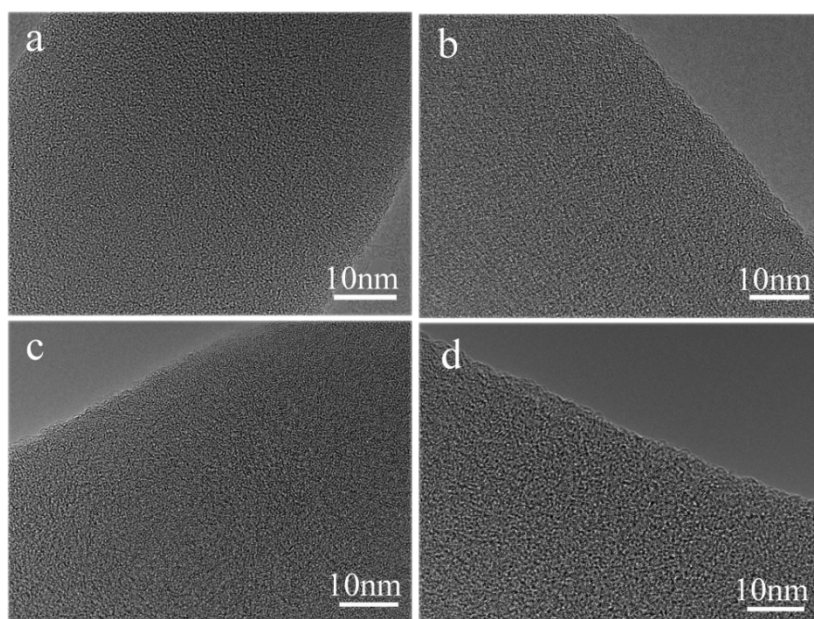

**Fig.SI5** HRTEM images of the four samples (a for 500°C, b for 700°C, c for 900°C, d for 1100°C).
